# Supplementary material
Source: MDPI journal article supplement (https://www.mdpi.com/1424-2818/15/1/117)
Supplement: s1 [file s1]

**Table S1.** Mitogenome sequences obtained from GenBank for gene arrangement analyses.

| Species                                     | Number      | Class             | Family               | Length | Reference    |
|---------------------------------------------|-------------|-------------------|----------------------|--------|--------------|
| <i>Acasta cyathus</i>                       | MN615272    | Balanomorph<br>a  | Balanidae            | 15,251 | Unpublished  |
| <i>Acasta sulcata</i>                       | NC_029168.1 | Balanomorph<br>a  | Balanidae            | 15,326 | Unpublished. |
| <i>Altiverruca navicular*</i><br>(outgroup) | NC_037244.1 | Verrucomorp<br>ha | Verrucidae           | 15,976 | [57]         |
| <i>Amphibalanus amphitrite</i>              | NC_024525.1 | Balanomorph<br>a  | Balanidae            | 15,683 | [46]         |
| <i>Armatobalanus allium</i>                 | NC_029167.1 | Balanomorph<br>a  | Balanidae            | 15,063 | Unpublished  |
| <i>Balanus balanus</i>                      | NC_026466.1 | Balanomorph<br>a  | Balanidae            | 15,955 | [15]         |
| <i>Balanus trigonus</i>                     | NC_056392   | Balanomorph<br>a  | Balanidae            | 15,336 | Unpublished  |
| <i>Catomerus polymerus</i>                  | MH791045.1  | Balanomorph<br>a  | Catophragmida<br>e   | 15,446 | [22]         |
| <i>Chelonibia testudinaria</i>              | NC_029169.1 | Balanomorph<br>a  | Chelonibiidae        | 14,906 | Unpublished  |
| <i>Chthamalus antennatus</i>                | NC_026730.1 | Balanomorph<br>a  | Chthamalidae         | 15,165 | Unpublished  |
| <i>Chthamalus challenger</i>                | NC_043920.1 | Balanomorph<br>a  | Chthamalidae         | 15,358 | [17]         |
| <i>Chthamalus malayensis</i>                | NC_056950   | Balanomorph<br>a  | Chthamalidae         | 15,230 | Unpublished  |
| <i>Eochionelasmus coreana*</i>              | MT491209.1  | Balanomorph<br>a  | Chionelasmatic<br>ae | 17,035 | [21]         |
| <i>Eochionelasmus ohtai*</i>                | NC_036957.1 | Balanomorph<br>a  | Chionelasmatic<br>ae | 15,585 | [52]         |
| <i>Epopella plicata</i>                     | NC_033393.1 | Balanomorph<br>a  | Austrobalanida<br>e  | 15,296 | Unpublished  |
| <i>Fistulobalanus albicostatus</i>          | NC_053649   | Balanomorph<br>a  | Balanidae            | 15,665 | [20]         |
| <i>Megabalanus ajax</i>                     | NC_024636.1 | Balanomorph<br>a  | Balanidae            | 15,510 | [59]         |
| <i>Megabalanus tintinnabulum</i>            | NC_056162   | Balanomorph<br>a  | Balanidae            | 15,107 | [50]         |
| <i>Megabalanus volcano</i>                  | NC_006293.1 | Balanomorph<br>a  | Balanidae            | 15,107 | Unpublished  |
| <i>Nobia grandis</i>                        | NC_023945.1 | Balanomorph<br>a  | Pyrgomatidae         | 15,032 | [59]         |
| <i>Notochthamalus scabrosus</i>             | NC_022716.1 | Balanomorph<br>a  | Chthamalidae         | 15,397 | [50]         |
| <i>Octomeris</i> sp. BKKC-2014              | KJ754820.1  | Balanomorph<br>a  | Chthamalidae         | 15,484 | Unpublished  |
| <i>Pyrgopsella youngi</i>                   | MN615,273   | Balanomorph<br>a  | Pyrgomatidae         | 15,129 | Unpublished  |

|                                               |              |                  |               |        |             |
|-----------------------------------------------|--------------|------------------|---------------|--------|-------------|
| <i>Savignium</i> sp. BKKC-2014                | KJ754821.1   | Balanomorph<br>a | Pyrgomatidae  | 14,999 | Unpublished |
| <i>Semibalanus balanoides</i>                 | NC_039849.1  | Balanomorph<br>a | Balanidae     | 15,119 | [13]        |
| <i>Semibalanus cariosus</i>                   | NC_050836.1  | Balanomorph<br>a | Balanidae     | 15,118 | [23]        |
| <i>Striatobalanus amaryllis</i>               | NC_024526.1  | Balanomorph<br>a | Balanidae     | 15,064 | [19]        |
| <i>Tesseropora rosea</i>                      | NC_037241.1  | Balanomorph<br>a | Tetraclitidae | 15,330 | [48]        |
| <i>Tetraclita japonica</i>                    | NC_008974.1  | Balanomorph<br>a | Tetraclitidae | 15,194 | Unpublished |
| <i>Tetraclita kuroshioensis</i>               | NC_056911.1  | Balanomorph<br>a | Tetraclitidae | 15,175 | [47]        |
| <i>Tetraclita rufotincta</i>                  | NC_037398.1  | Balanomorph<br>a | Tetraclitidae | 15,002 | [49]        |
| <i>Tetraclita serrata</i>                     | NC_02915.4.1 | Balanomorph<br>a | Tetraclitidae | 15,200 | [16]        |
| <i>Tetraclita squamosa</i><br><i>squamosa</i> | MT232759.1   | Balanomorph<br>a | Tetraclitidae | 15,191 | [38]        |
| <i>Tetraclitella divisa</i>                   | NC_029170.1  | Balanomorph<br>a | Tetraclitidae | 14,973 | Unpublished |
| <i>Megabalanus coccopoma</i>                  | OK631889     | Balanomorph<br>a | Balanidae     | 15,098 | This study  |

Note: \* indicates deep-sea species

**Table S2.** Mitogenome sequences obtained from GenBank for phylogenetic analyses.

| Species                            | Number      | Class             | Family           | Length  | Reference   |
|------------------------------------|-------------|-------------------|------------------|---------|-------------|
| <i>Acasta cyathus</i>              | MN615,272   | Balanomorpha      | Balanidae        | 15,251  | Unpublished |
| <i>Acasta sulcata</i>              | NC_029168.1 | Balanomorpha      | Balanidae        | 15,326  | Unpublished |
| <i>Altiverruca navicular*</i>      | NC_037244.1 | Verrucomorpha     | Verrucidae       | 15,976  | [57]        |
| <i>Amphibalanus amphitrite</i>     | NC_024525.1 | Balanomorpha      | Balanidae        | 15,683  | [46]        |
| <i>Arcoscalpellum epeum</i>        | MH791047    | Scalpellomorpha   | Scalpellidae     | 15,593  | [56]        |
| <i>Armatobalanus allium</i>        | NC_029167.1 | Balanomorpha      | Balanidae        | 15,063  | Unpublished |
| <i>Balanus balanus</i>             | NC_026466.1 | Balanomorpha      | Balanidae        | 15,955  | [43]        |
| <i>Balanus trigonus</i>            | NC_056392   | Balanomorpha      | Balanidae        | 15,336  | Unpublished |
| <i>Capitulum mitella</i>           | NC_008742.1 | Pollicipedomorpha | Pollicipedidae   | 14,915, | [53]        |
| <i>Catomerus polymerus</i>         | MH791045.1  | Balanomorpha      | Catophragmidae   | 15,446  | [22]        |
| <i>Chelonibia testudinaria</i>     | NC_029169.1 | Balanomorpha      | Chelonibiidae    | 14,906  | Unpublished |
| <i>Chthamalus antennatus</i>       | NC_026730.1 | Balanomorpha      | Chthamalidae     | 15,165  | Unpublished |
| <i>Chthamalus challenger</i>       | NC_043920.1 | Balanomorpha      | Chthamalidae     | 15,358  | [17]        |
| <i>Chthamalus malayensis</i>       | NC_056950   | Balanomorpha      | Chthamalidae     | 15,230  | Unpublished |
| <i>Eochionelasmus coreana*</i>     | MT491209.1  | Balanomorpha      | Chionelasmatidae | 17,035  | [21]        |
| <i>Eochionelasmus ohtai*</i>       | NC_036957.1 | Balanomorpha      | Chionelasmatidae | 15,585  | [52]        |
| <i>Epopella plicata</i>            | NC_033393.1 | Balanomorpha      | Austrobalanidae  | 15,296  | Unpublished |
| <i>Fistulobalanus albicostatus</i> | NC_053649   | Balanomorpha      | Balanidae        | 15,665  | [20]        |
| <i>Glyptelasma annandalei</i>      | NC_043898.1 | Scalpellomorpha   | Poecilasmatidae  | 16,107  | [39]        |
| <i>Lepas australis</i>             | NC_025295.1 | Scalpellomorpha   | Lepadidae        | 15,502  | [7]         |
| <i>Lepas anserifera</i>            | NC_026576.1 | Scalpellomorpha   | Lepadidae        | 15,657  | Unpublished |
| <i>Lepas anatifera</i>             | NC_062431.1 | Scalpellomorpha   | Lepadidae        | 15,708  | Unpublished |
| <i>Megabalanus ajax</i>            | NC_024636.1 | Balanomorpha      | Balanidae        | 15,510  | [59]        |
| <i>Megabalanus tintinnabulum</i>   | NC_056162   | Balanomorpha      | Balanidae        | 15,107  | [44]        |

|                                         |                  |                   |                |        |             |
|-----------------------------------------|------------------|-------------------|----------------|--------|-------------|
| <i>Megabalanus volcano</i>              | NC_00629<br>3.1  | Balanomorpha      | Balanidae      | 15,107 | Unpublished |
| <i>Nobia grandis</i>                    | NC_02394<br>5.1  | Balanomorpha      | Pyrgomatidae   | 15,032 | [59]c       |
| <i>Notochthamalus scabrosus</i>         | NC_02271<br>6.1  | Balanomorpha      | Chthamalidae   | 15,397 | [50]        |
| <i>Octomeris</i> sp. BKKC-2014          | KJ754820.1       | Balanomorpha      | Chthamalidae   | 15,484 | Unpublished |
| <i>Polyascus gregaria</i><br>(outgroup) | JN616263.1       | Rhizocephala      | Polyascidae    | 15,465 | [37]        |
| <i>Pollicipes polymerus</i>             | NC_00593<br>6.1  | Pollicipedomorpha | Pollicipedidae | 15,634 | [54]        |
| <i>Pyrgopsella youngi</i>               | MN615,27<br>3    | Balanomorpha      | Pyrgomatidae   | 15,129 | Unpublished |
| <i>Savignium</i> sp. BKKC-2014          | KJ754821.1       | Balanomorpha      | Pyrgomatidae   | 14,999 | Unpublished |
| <i>Semibalanus balanoides</i>           | NC_03984<br>9.1  | Balanomorpha      | Balanidae      | 15,119 | [13]        |
| <i>Semibalanus cariosus</i>             | NC_05083<br>6.1  | Balanomorpha      | Balanidae      | 15,118 | [23]        |
| <i>Striatobalanus amaryllis</i>         | NC_02452<br>6.1  | Balanomorpha      | Balanidae      | 15,064 | [19]        |
| <i>Sacculina</i> sp. (outgroup)         | MZ4115,48<br>.1  | Rhizocephala      | Sacculinidae   | 14,579 | Unpublished |
| <i>Tesseropora rosea</i>                | NC_03724<br>1.1  | Balanomorpha      | Tetraclitidae  | 15,330 | [48]        |
| <i>Tetraclita japonica</i>              | NC_00897<br>4.1  | Balanomorpha      | Tetraclitidae  | 15,194 | Unpublished |
| <i>Tetraclita kuroshioensis</i>         | NC_05691<br>1.1  | Balanomorpha      | Tetraclitidae  | 15,175 | [47]        |
| <i>Tetraclita rufotincta</i>            | NC_03739<br>8.1  | Balanomorpha      | Tetraclitidae  | 15,002 | [49]        |
| <i>Tetraclita serrata</i>               | NC_02915,<br>4.1 | Balanomorpha      | Tetraclitidae  | 15,200 | [16]        |
| <i>Tetraclita squamosa squamosa</i>     | MT232759.<br>1   | Balanomorpha      | Tetraclitidae  | 15,191 | [38]        |
| <i>Tetraclitella divisa</i>             | NC_02917<br>0.1  | Balanomorpha      | Tetraclitidae  | 14,973 | Unpublished |
| <i>Vulcanolepas fijiensis</i> *         | NC_04530<br>6.1  | Scalpellomorpha   | Neolepadidae   | 17,374 | [55]        |
| <i>Megabalanus coccopoma</i>            | OK631889         | Balanomorpha      | Balanidae      | 15,098 | This study  |

Note: \* indicates deep-sea species

**Table S3.** Condon usage in *M. coccopoma*.

| Condon | Number | Percent |
|--------|--------|---------|--------|--------|---------|--------|--------|---------|--------|--------|---------|
| UUU-F  | 259    | 7.05    | UCU-S  | 118    | 3.21    | UAU-Y  | 92     | 2.50    | UGU-C  | 32     | 0.87    |
| UUC-F  | 108    | 2.94    | UCC-S  | 37     | 1.01    | UAC-Y  | 52     | 1.41    | UGC-C  | 7      | 0.19    |
| UUA-L  | 240    | 6.53    | UCA-S  | 71     | 1.93    | UAA-*  | 8      | 0.22    | UGA-W  | 85     | 2.31    |

|       |     |      |       |    |      |       |    |      |       |     |      |
|-------|-----|------|-------|----|------|-------|----|------|-------|-----|------|
| UUG-L | 24  | 0.65 | UCG-S | 15 | 0.41 | UAG-* | 5  | 0.14 | UGG-W | 20  | 0.54 |
| CUU-L | 117 | 3.18 | CCU-P | 68 | 1.85 | CAU-H | 46 | 1.25 | CGU-R | 19  | 0.52 |
| CUC-L | 46  | 1.25 | CCC-P | 28 | 0.76 | CAC-H | 32 | 0.87 | CGC-R | 4   | 0.11 |
| CUA-L | 98  | 2.67 | CCA-P | 37 | 1.01 | CAA-Q | 53 | 1.44 | CGA-R | 31  | 0.84 |
| CUG-L | 19  | 0.52 | CCG-P | 10 | 0.27 | CAG-Q | 10 | 0.27 | CGG-R | 6   | 0.16 |
| AUU-I | 257 | 6.99 | ACU-T | 72 | 1.96 | AAU-N | 88 | 2.39 | AGU-S | 33  | 0.90 |
| AUC-I | 60  | 1.63 | ACC-T | 30 | 0.82 | AAC-N | 44 | 1.20 | AGC-S | 10  | 0.27 |
| AUA-M | 159 | 4.33 | ACA-T | 80 | 2.18 | AAA-K | 81 | 2.20 | AGA-S | 70  | 1.90 |
| AUG-M | 40  | 1.09 | ACG-T | 11 | 0.30 | AAG-K | 16 | 0.44 | AGG-S | 5   | 0.14 |
| GUU-V | 88  | 2.39 | GCU-A | 98 | 2.67 | GAU-D | 57 | 1.55 | GGU-G | 67  | 1.82 |
| GUC-V | 24  | 0.65 | GCC-A | 46 | 1.25 | GAC-D | 20 | 0.54 | GGC-G | 8   | 0.22 |
| GUA-V | 92  | 2.50 | GCA-A | 56 | 1.52 | GAA-E | 74 | 2.01 | GGA-G | 119 | 3.24 |
| GUG-V | 20  | 0.54 | GCG-A | 6  | 0.16 | GAG-E | 15 | 0.41 | GGG-G | 33  | 0.90 |

---
